# Supplementary material for: Facile microwave-assisted synthesis and effective photocatalytic hydrogen generation of Zn2GeO4 with different morphology
Source: Royal Society of Chemistry journal article supplement (doi:10.1039/c4ra01041h), 2014-01-01
Supplement: c4ra01041h1.pdf [file c4ra01041h1.pdf]

**Electronic Supplementary Information (ESI):**

**Facile Microwave-assisted Synthesis and Effective Photocatalytic Hydrogen Generation of  $\text{Zn}_2\text{GeO}_4$  with different morphology**

**Min Yang, Ying Ji, Wei Liu, Ying Wang, Xiaoyang Liu\***

a State Key Laboratory of Inorganic Synthesis and Preparative Chemistry, Jilin University, Changchun 130012, P.R. China

\* Corresponding author. Tel/Fax: +86-431-85168316.

E-mail address: liuxy@jlu.edu.cn (L. X. Yang).

\* E-mail address: yangmin820525@126.com

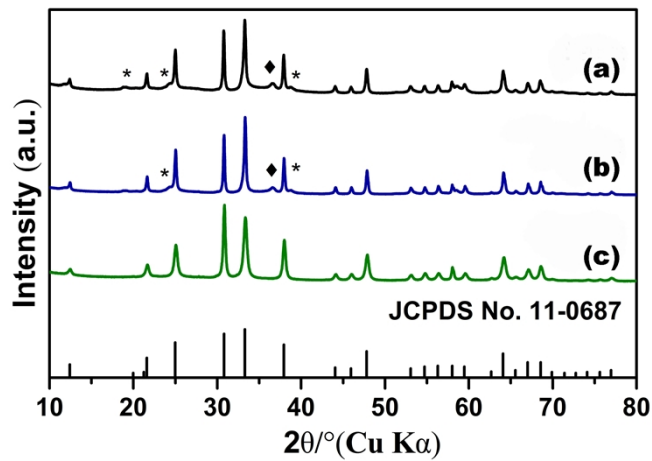

**Fig.S1** XRD pattern of Zn<sub>2</sub>GeO<sub>4</sub> nanorods at different reaction temperatures: (a) 100 °C, (b) 120 °C and (c) 140 °C, \*:Zn(OH)<sub>2</sub>; ◆:GeO<sub>2</sub>.

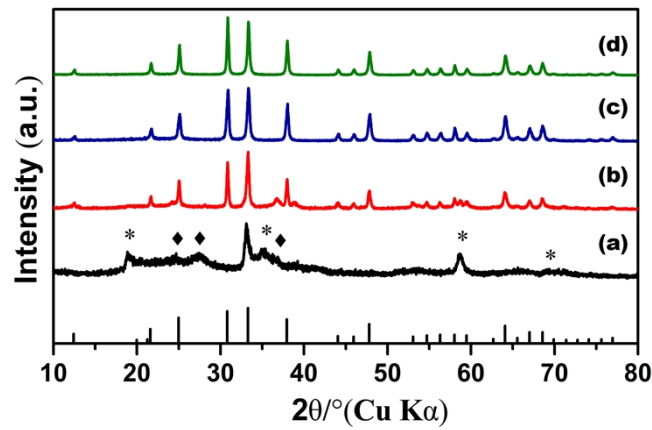

**Fig.S2** XRD pattern of Zn<sub>2</sub>GeO<sub>4</sub> microspheres at different reaction temperatures: (a) 100 °C, (b) 120 °C, (c) 140 °C and (d) 170 °C.

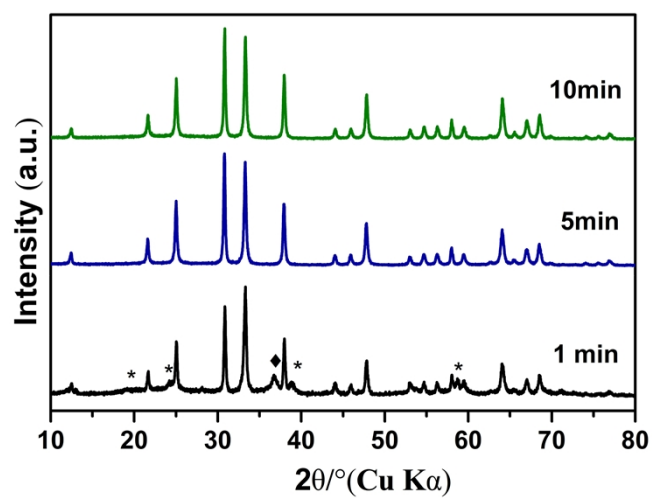

**Fig.S3** XRD pattern of Zn<sub>2</sub>GeO<sub>4</sub> microspheres 170 °C with different reaction times.

Table S1 Hydrogen evolution rate of some recently-reported a methanol-water solution under exposure to UV light

| Catalyst                                               | H <sub>2</sub> evolution rate<br>(mmol g <sup>-1</sup> h <sup>-1</sup> ) | ref                                          |
|--------------------------------------------------------|--------------------------------------------------------------------------|----------------------------------------------|
| Zn <sub>2</sub> GeO <sub>4</sub> nanorods              | 6.24                                                                     | This work                                    |
| Zn <sub>2</sub> GeO <sub>4</sub> microspheres          | 3.76                                                                     | This work                                    |
| Zn <sub>2</sub> GeO <sub>4</sub> bundles               | 4.90                                                                     | <i>J. Mater. Chem. A</i> , 2013,<br>1, 7798  |
| Hexagonal Zn <sub>2</sub> GeO <sub>4</sub><br>nanorods | 6.00                                                                     | <i>Inorg. Chem.</i> 2013, 52,<br>6916        |
| Zn <sub>2</sub> GeO <sub>4</sub> hollow spheres        | 6.23                                                                     | <i>J. Mater. Chem. A</i> , 2013,<br>1, 10622 |
